# Supplementary material for: Sleep apnoea management in Europe during the COVID-19 pandemic: data from the European Sleep Apnoea Database (ESADA)
Source: PubMed Central journal article supplement — Eur Respir J. 2020 Jun 18;55(6):2001323. doi: 10.1183/13993003.01323-2020 (PMC7236823; doi:10.1183/13993003.01323-2020), 2020-06-18
Supplement: ERJ-01323-2020.Shareable.pdf [file ERJ-01323-2020.Shareable.pdf]

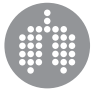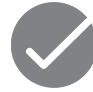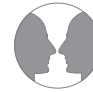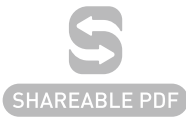

# Sleep apnoea management in Europe during the COVID-19 pandemic: data from the European Sleep Apnoea Database (ESADA)

Ludger Grote <sup>1,2</sup>, Walter T. McNicholas <sup>3</sup> and Jan Hedner<sup>1,2</sup> on behalf of the ESADA collaborators<sup>4</sup>

**Affiliations:** <sup>1</sup>Centre for Sleep and Wake Disorders, Institute for Internal Medicine, Sahlgrenska Academy, University of Gothenburg, Gothenburg, Sweden. <sup>2</sup>Sleep Disorders Centre, Dept of Respiratory Medicine, Sahlgrenska University Hospital, Gothenburg, Sweden. <sup>3</sup>Dept of Respiratory and Sleep Medicine, St Vincent's Hospital Group, School of Medicine, University College, Dublin, Ireland. <sup>4</sup>A list of the ESADA collaborators can be found in the acknowledgements section.

**Correspondence:** Ludger Grote, Sleep Disorders Centre, Dept of Respiratory Medicine, Sahlgrenska University Hospital, 413 45 Gothenburg, Sweden. E-mail: ludger.grote@lungall.gu.se

@ERSpublications

**This study identified an 80% shutdown of sleep apnoea management throughout Europe. Most services have been limited to phone-based follow-up and the management of high-priority cases. Mitigation strategies appear to be insufficiently exploited.** <https://bit.ly/2KWf3IY>

**Cite this article as:** Grote L, McNicholas WT, Hedner J. Sleep apnoea management in Europe during the COVID-19 pandemic: data from the European Sleep Apnoea Database (ESADA). *Eur Respir J* 2020; 55: 2001323 [<https://doi.org/10.1183/13993003.01323-2020>].

This single-page version can be shared freely online.

*To the Editor:*

Sleep disordered breathing (SDB) is highly prevalent, with a male to female predominance of two to one, and is more common in middle-aged and elderly subjects [1]. Affected patients often present with comorbidities such as obesity, cardiovascular disease (systemic hypertension, heart failure, atrial fibrillation) and diabetes mellitus type II [2]. The strong overlap between the profile for SDB patients and the identified risk factors for adverse outcomes of coronavirus disease 2019 (COVID-19) infection, which include age, male sex and cardiometabolic comorbidity [3], suggest that SDB patients may benefit from effective therapy if confronted with COVID-19 infection [4].
